# Supplementary material
Source: PubMed Central journal article supplement (PMC5289862)

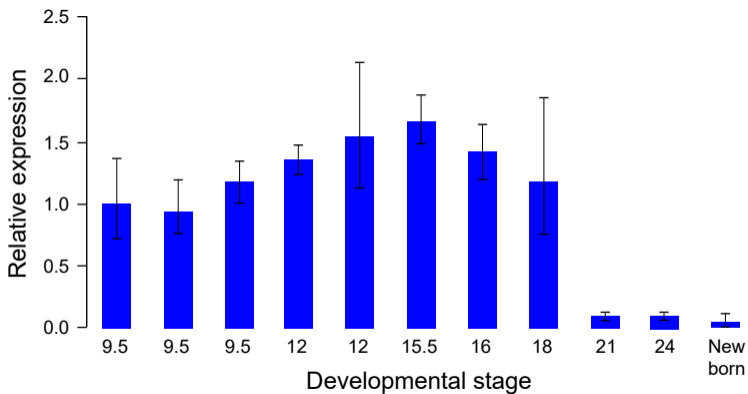

Supplement: 955Figure_S1.pdf [file 955Figure_S1.pdf]
